# Supplementary material for: Oxygen dependence of metabolic fluxes and energy generation of Saccharomyces cerevisiae CEN.PK113-1A
Source: Springer Nature journal article supplement (doi:10.1186/1752-0509-2-60), 2008-07-09

### a) Pyruvate branching point

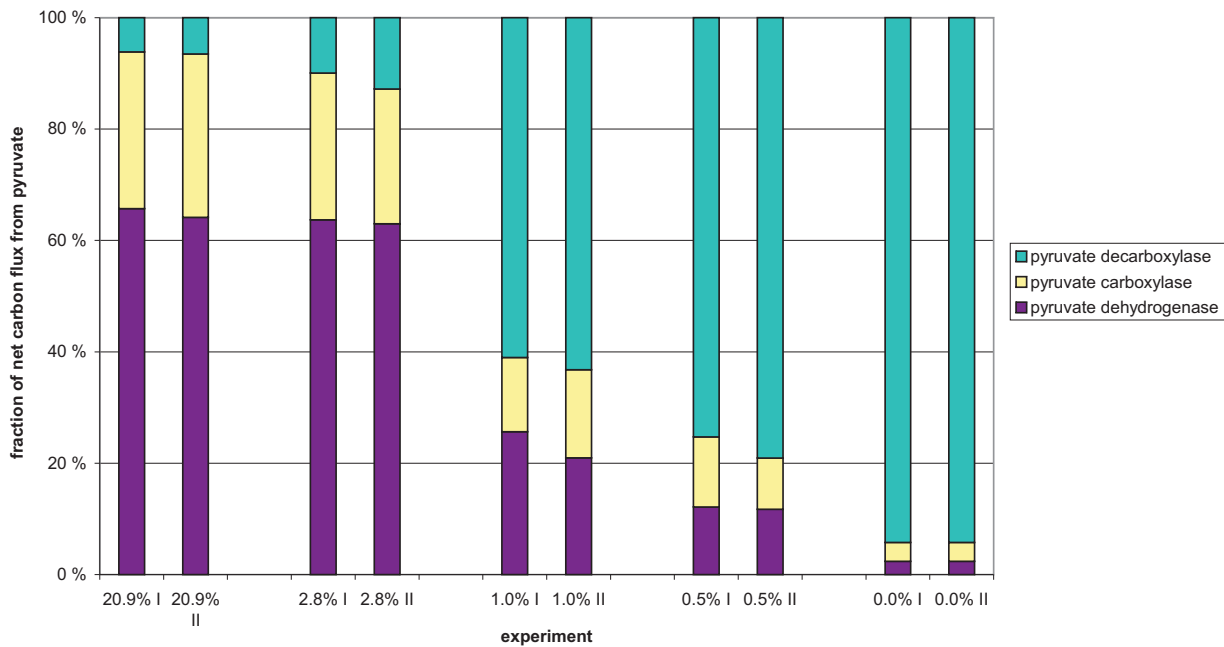

### b) TCA cycle net fluxes

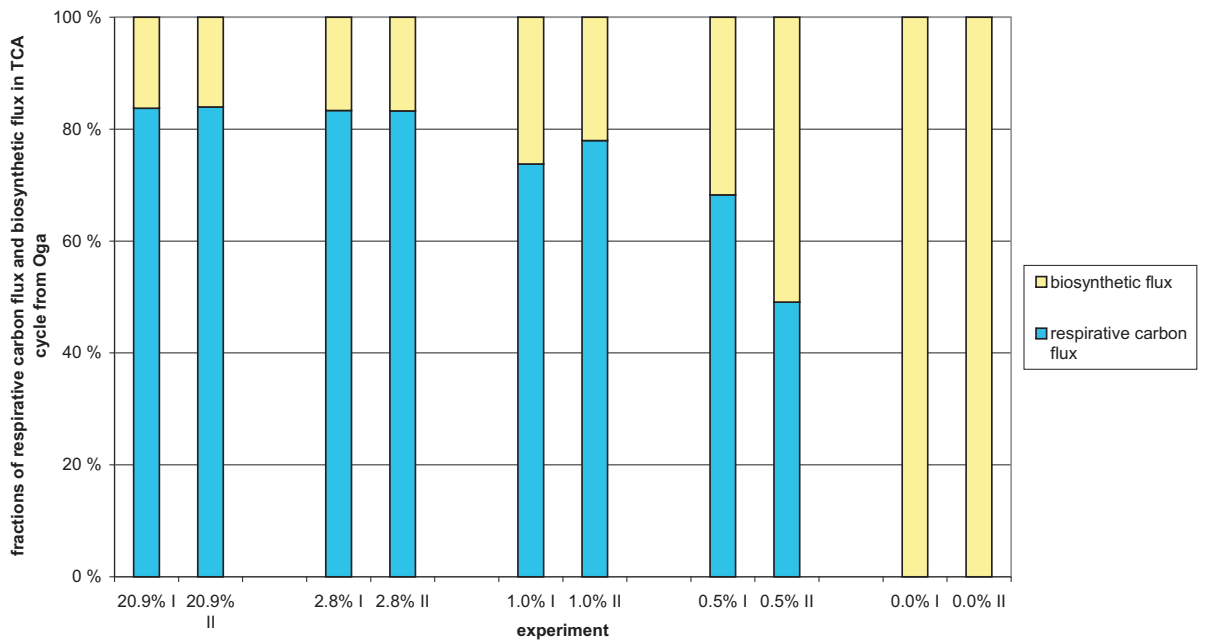

### c) Glycolytic and oxidative PPP flux split

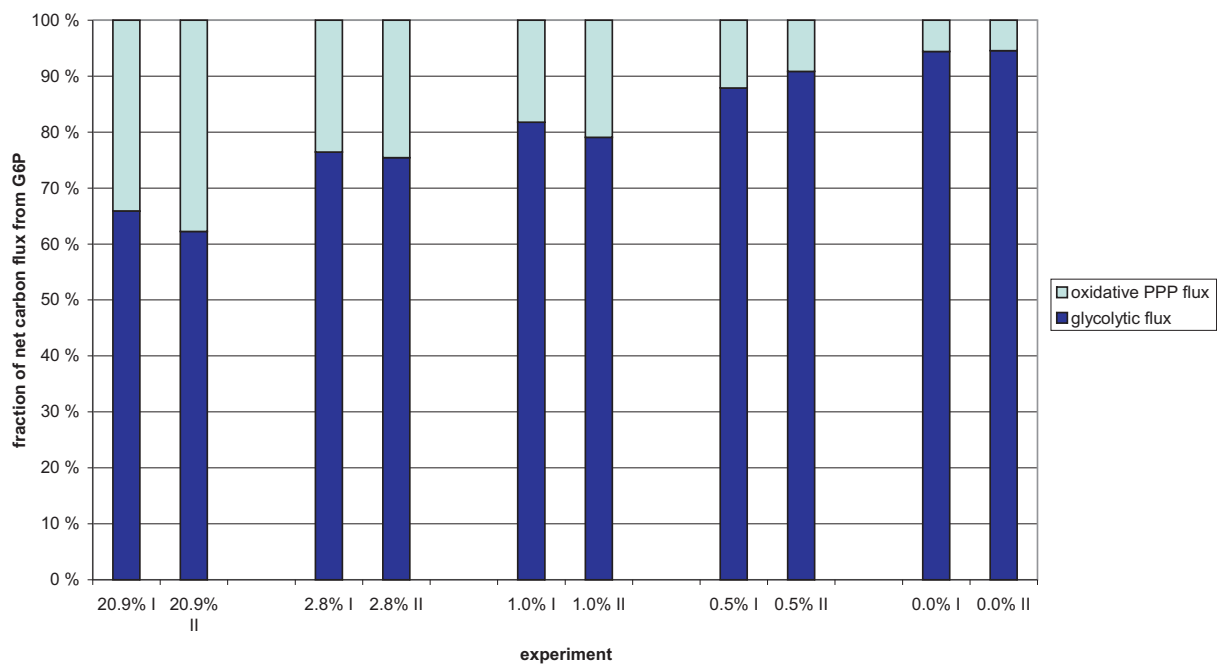

Supplement: 12918_2008_217_MOESM7_ESM.pdf [file 12918_2008_217_MOESM7_ESM.pdf]
